# Supplementary material for: Disentangling the “tip-effects” enhanced antibacterial mechanism of Ag nanoparticles
Source: Royal Society of Chemistry journal article supplement (doi:10.1039/d4dt01173b), 2024-01-01
Supplement: d4dt01173b1.pdf [file d4dt01173b1.pdf]

## Disentangling the “tip-effects” enhanced antibacterial mechanism of Ag nanoparticles

Shenli Wang,<sup>a\*</sup> Yanping Zhang,<sup>a</sup> Xuan Chen,<sup>b</sup> Stefanos Mourdikoudis,<sup>c</sup> Shengshi Fan,<sup>b</sup> Haoyu Li,<sup>b</sup> Sergio Gómez-Graña,<sup>c</sup> Shuncheng Ren,<sup>a</sup> Guangchao Zheng<sup>b,d\*</sup>

<sup>a</sup> College of Food Science and Technology, Henan University of Technology, Zhengzhou 450001, China;

<sup>b</sup> Key Laboratory of Materials Physics, Ministry of Education, School of Physics, Zhengzhou University, Zhengzhou 450001, P. R. China

<sup>c</sup> CINBIO, Universidade de Vigo, Materials Chemistry and Physics Group, Department of Physical Chemistry, Campus Universitario Lagoas Marcosende, 36310 Vigo, Spain

<sup>d</sup> Institute of Quantum Materials and Physics, Henan Academy of Sciences, Zhengzhou 450046, China

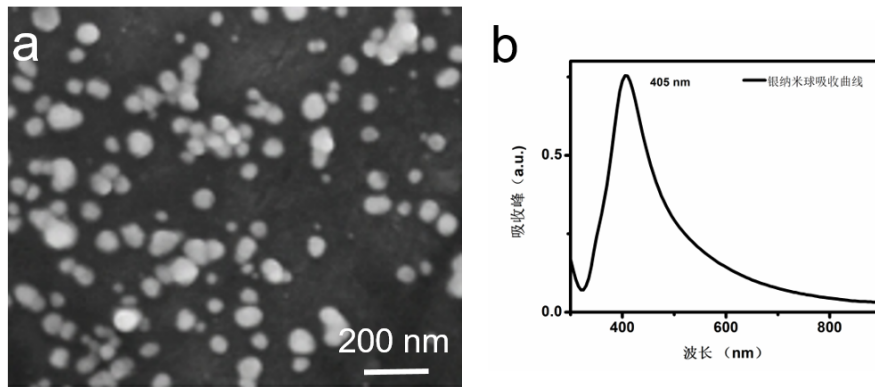

**Fig. S1** (a) SEM image and (b) UV-vis-NIR spectrum of Ag nanospheres

**Table S1** The diameter of antibacterial zone of nano silver on *E. coli* and *S. aureus* (non-sunshine conditions)

| materials        | conditions | <i>E.coli</i> (mm)        | <i>S.Aureus</i> (mm)      |
|------------------|------------|---------------------------|---------------------------|
| Ag nanospheres   | dark       | -                         | -                         |
|                  | normal     | -                         | -                         |
|                  | light      | -                         | -                         |
| Ag nanotriangles | dark       | 8.67±0.29 <sup>b</sup>    | 18.83 ± 0.29 <sup>c</sup> |
|                  | normal     | 9 ± 0 <sup>b</sup>        | 19.67 ± 0.29 <sup>b</sup> |
|                  | light      | 16.33 ± 0.58 <sup>a</sup> | 20.67 ± 0.58 <sup>a</sup> |

**Table S2** The MIC and MBC of Ag NPs on the *E. coli* and *S. aureus* (non-sunshine conditions)

| materials        | conditions | <i>E.coli</i> (mm)        | <i>S.Aureus</i> (mm)      |
|------------------|------------|---------------------------|---------------------------|
| Ag nanospheres   | dark       | -                         | -                         |
|                  | normal     | -                         | -                         |
|                  | light      | -                         | -                         |
| Ag nanotriangles | dark       | 8.67±0.29 <sup>b</sup>    | 18.83 ± 0.29 <sup>c</sup> |
|                  | normal     | 9 ± 0 <sup>b</sup>        | 19.67 ± 0.29 <sup>b</sup> |
|                  | light      | 16.33 ± 0.58 <sup>a</sup> | 20.67 ± 0.58 <sup>a</sup> |

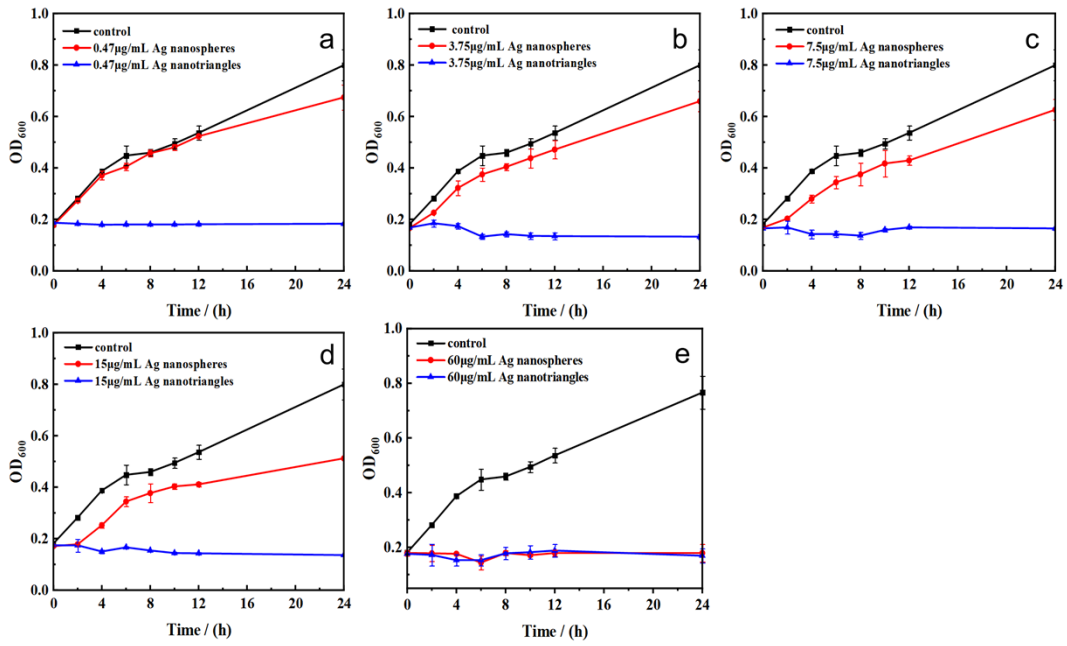

**Fig. S2** Effects of Ag nanospheres and nanotriangles with different amounts (a-e:  $0.47 \mu\text{g/mL}$ ;  $3.75 \mu\text{g/mL}$ ;  $7.5 \mu\text{g/mL}$ ;  $15 \mu\text{g/mL}$ ;  $60 \mu\text{g/mL}$ ) on the growth curve of *Escherichia coli* (non-sunshine conditions).

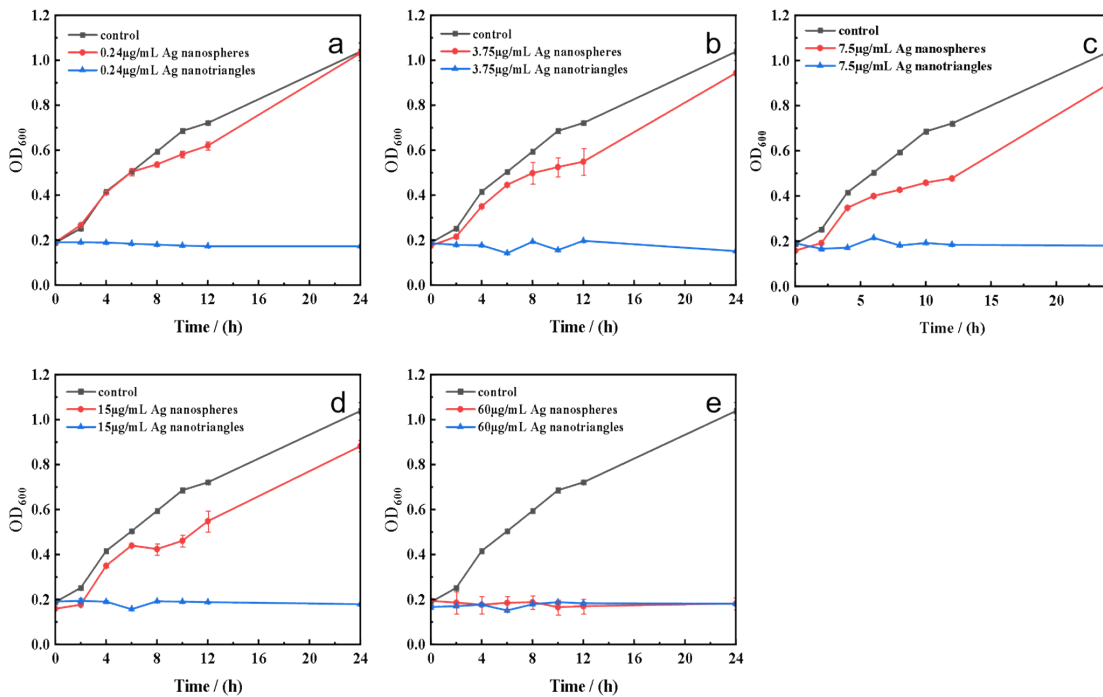

**Fig. S3** Effects of Ag nanospheres and nanotriangles with different amounts (a:  $0.24 \mu\text{g/mL}$ ;  $3.75 \mu\text{g/mL}$ ;  $7.5 \mu\text{g/mL}$ ;  $15 \mu\text{g/mL}$ ;  $60 \mu\text{g/mL}$ ) on the growth curve of *S. aureus* (no sunshine).

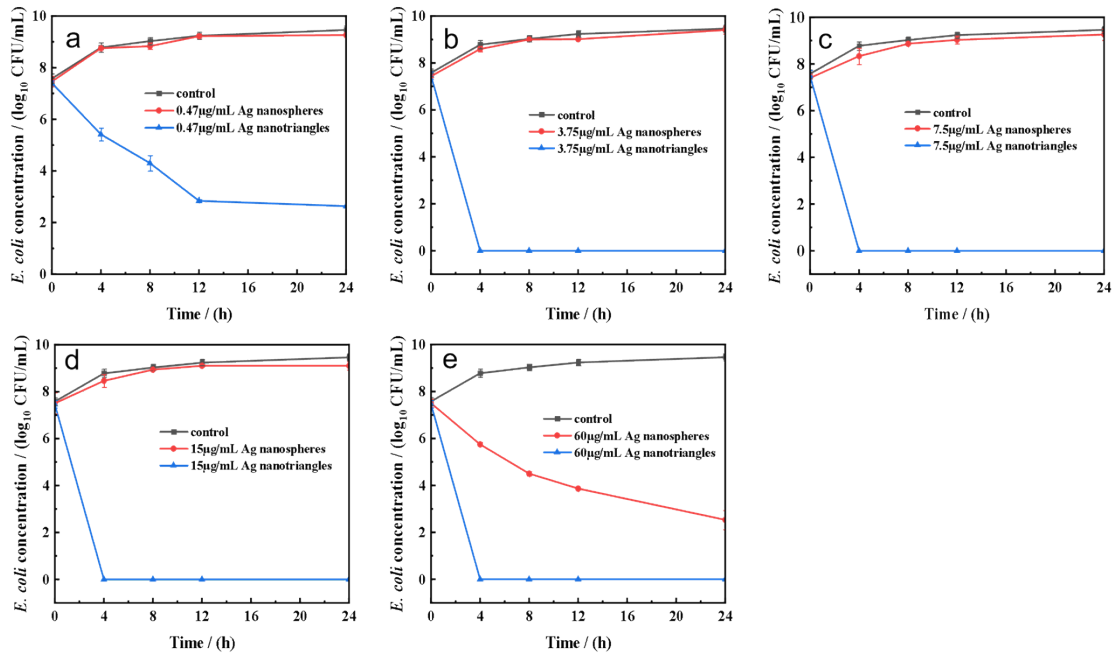

**Fig. S4** Effects of Ag nanospheres and nanotriangles with different amounts (a:  $0.47 \mu\text{g/mL}$ ;  $3.75 \mu\text{g/mL}$ ;  $7.5 \mu\text{g/mL}$ ;  $15 \mu\text{g/mL}$ ;  $60 \mu\text{g/mL}$ ) on the Bactericidal Curve of *E. coli*. (no sunshine).

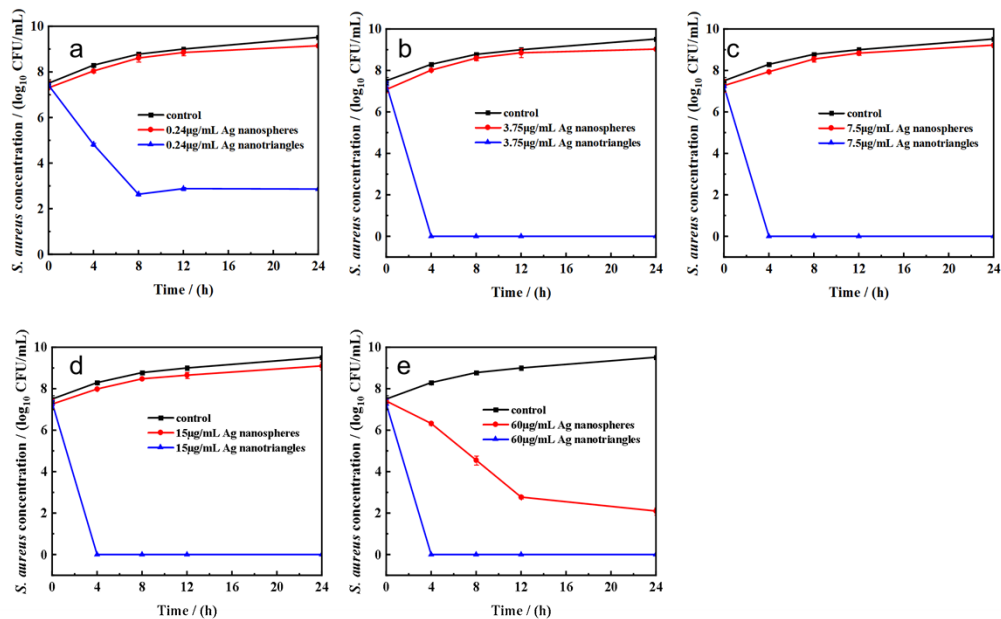

**Fig. S5** Effects of Ag nanospheres and nanotriangles with different amounts (a:  $0.24 \mu\text{g/mL}$ ;  $3.75 \mu\text{g/mL}$ ;  $7.5 \mu\text{g/mL}$ ;  $15 \mu\text{g/mL}$ ;  $60 \mu\text{g/mL}$ ) on the Bactericidal Curve of *S. aureus* (no sunshine).

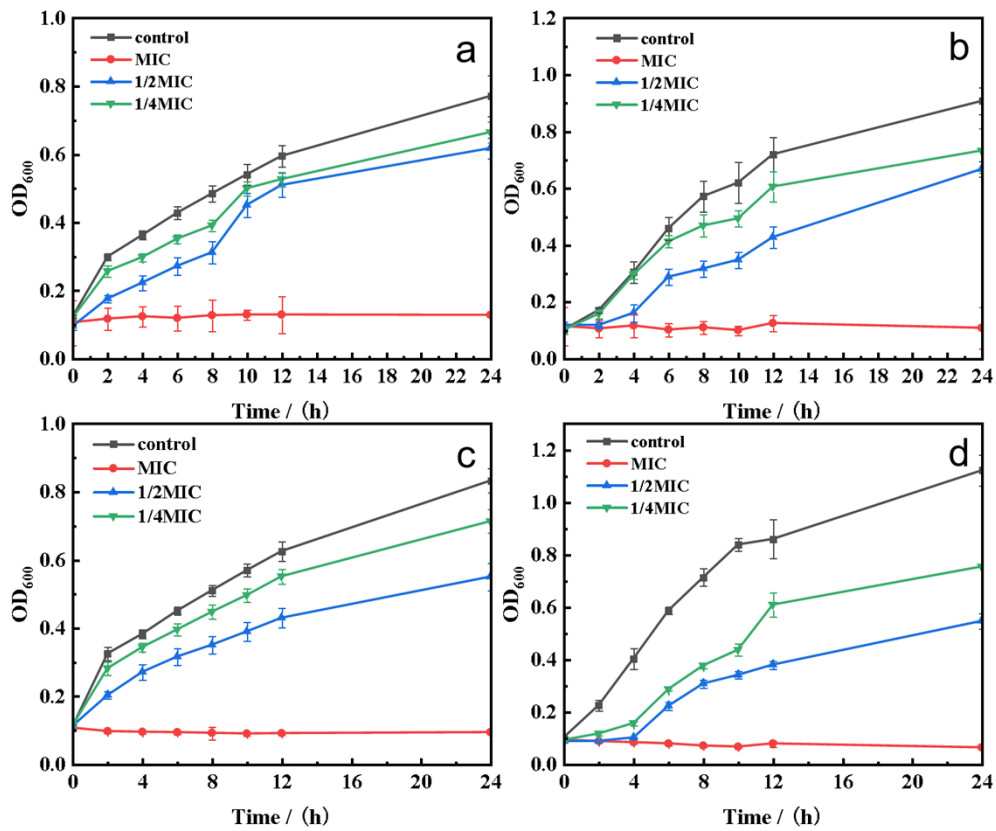

**Fig. S6** Effects of Ag nanospheres with different amounts (MIC; 1/2 MIC; 1/4 MIC) on the growth curve of *E. coli*. (a) and *S. aureus* (b) (under sunshine irradiation). Effects of Ag nanotriangles with different amounts (MIC; 1/2 MIC; 1/4 MIC) on the growth curve of *E. coli*. (c) and *S. aureus* (d) (under sunshine irradiation).

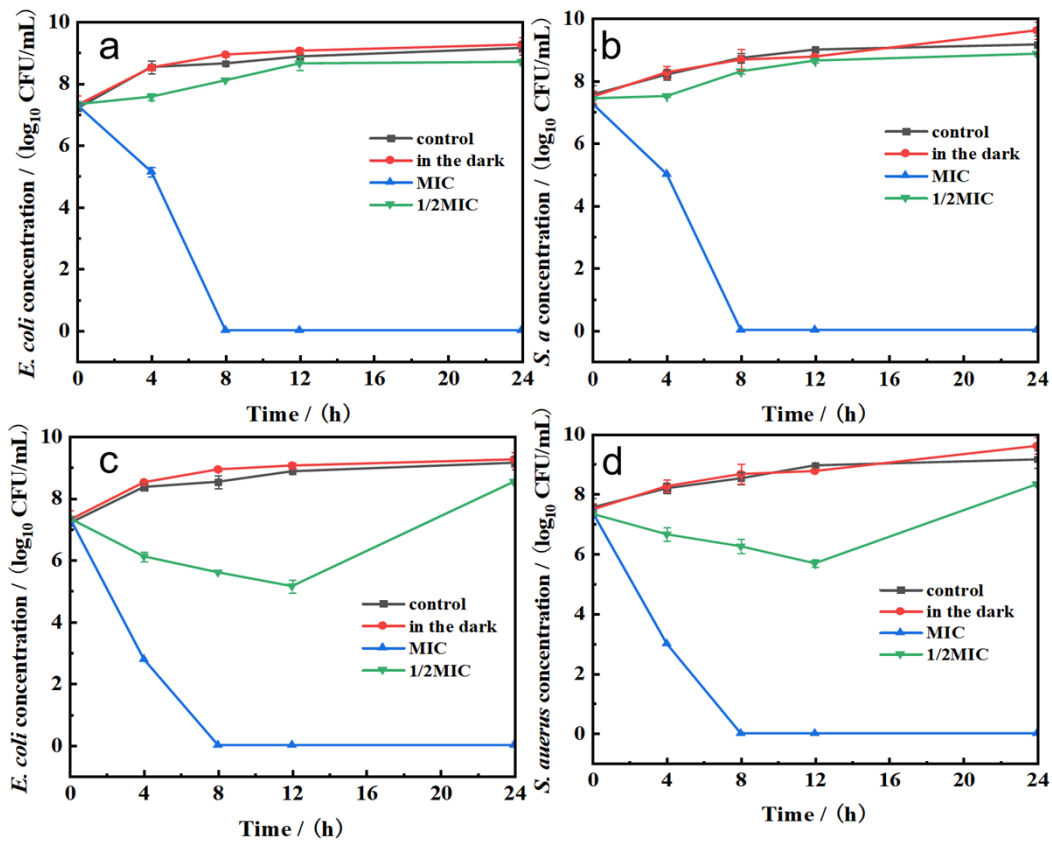

**Fig. S7** Effects of Ag nanospheres with different amounts (MIC; 1/2 MIC; 1/4 MIC) on the bactericidal curve of *E. coli*. (a) and *S. aureus* (b) (sunshine present). Effects of Ag nanotriangles with different amounts (MIC; 1/2 MIC; 1/4 MIC) on the bactericidal curve of *E. coli*. (c) and *S. aureus* (d) (under sunshine irradiation).

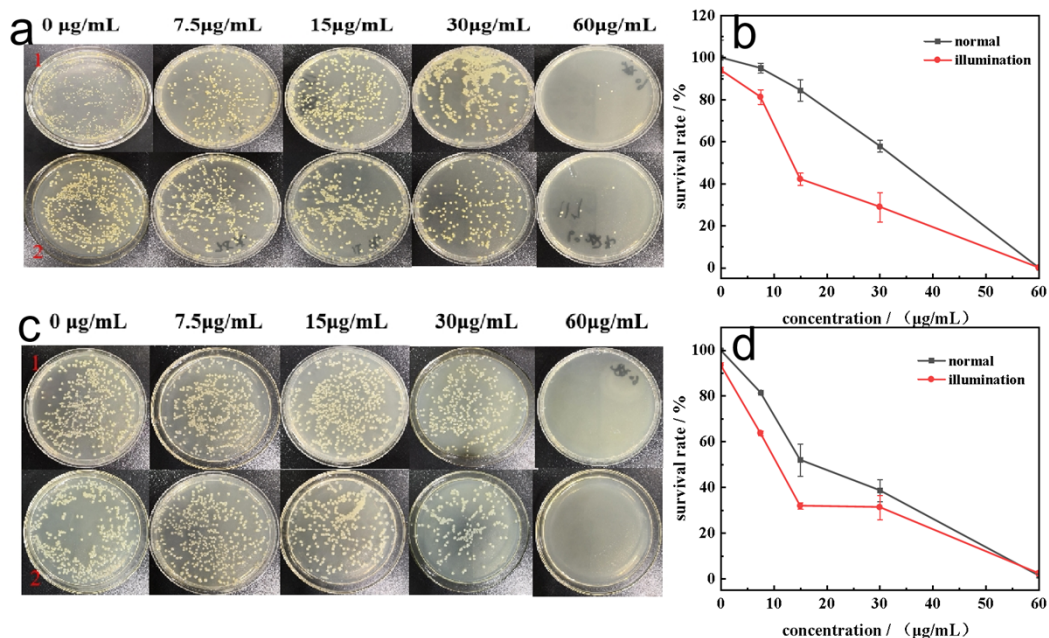

**Fig. S8** The photographs of *E. coli* (a) and *S. aureus* (c) treated with different amounts of Ag nanospheres and their corresponding survival rate (b) and (d), respectively (under sunshine irradiation).

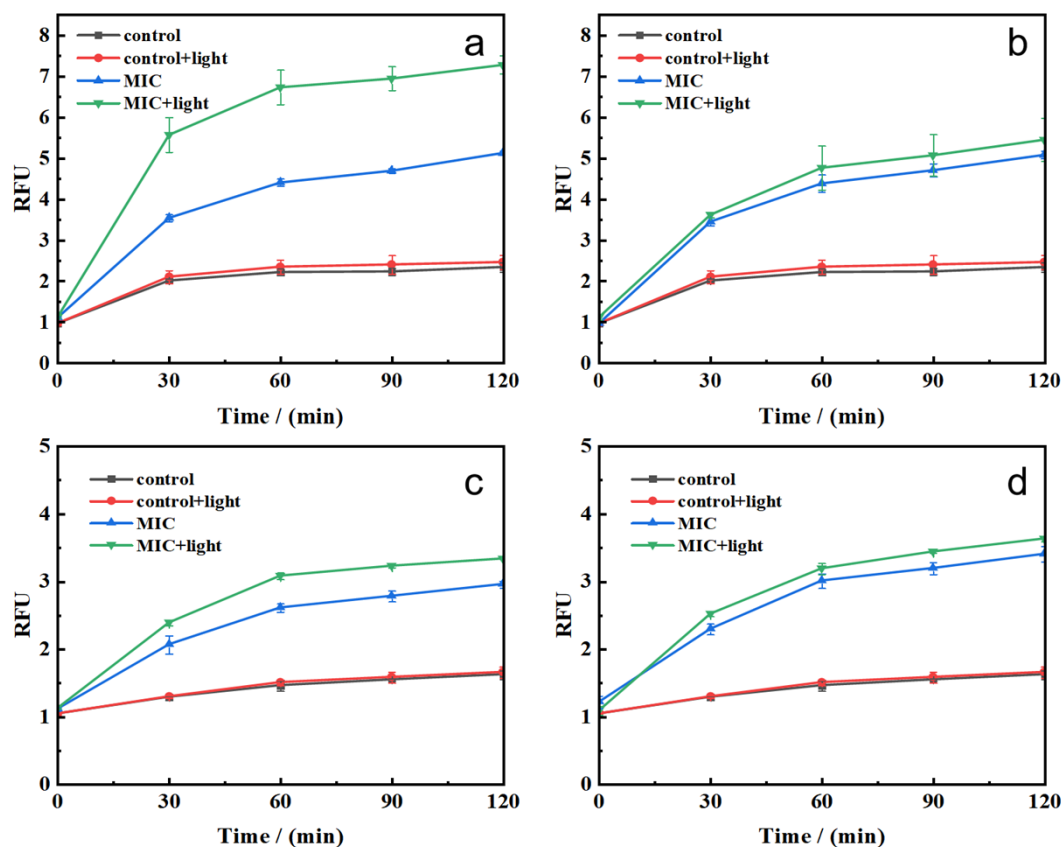

**Fig. S9** ROS generation curves of *E. coli* treated with the Ag nanoparticles (a) and Ag nanotriangles (b). ROS generation curves of *S. aureus* treated with Ag nanoparticles (c) and Ag nanotriangles (d). The concentration of Ag NPs is at the MIC value.

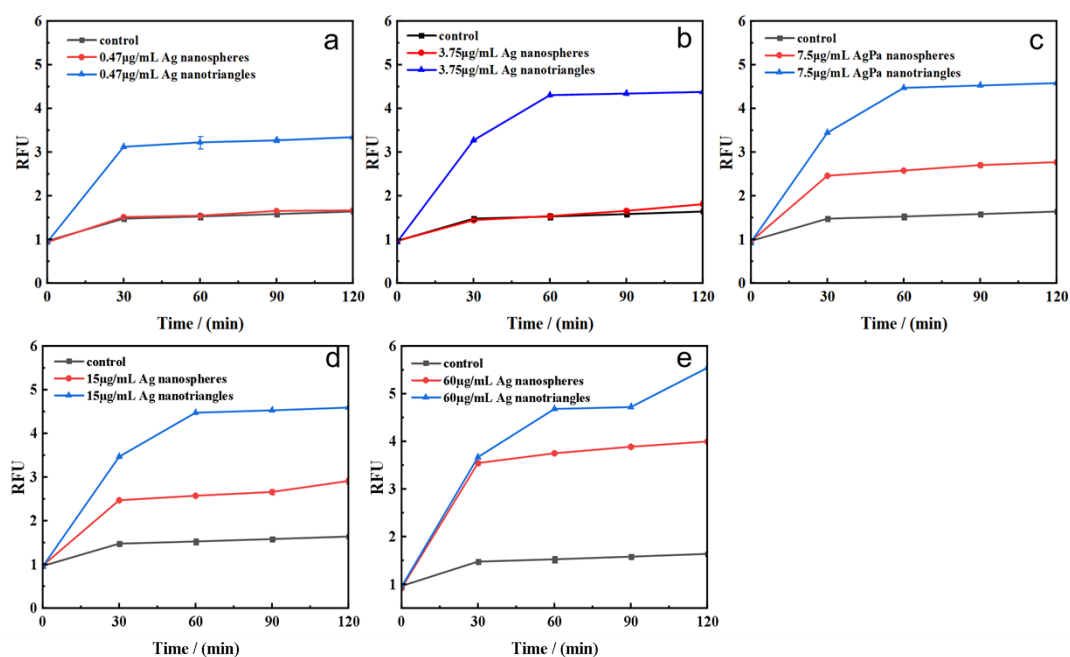

**Fig. S10** ROS generation efficiency of *E. coli* treated with the Ag nanoparticles and nanotriangles (a: 0.47  $\mu\text{g/mL}$ ; 3.75  $\mu\text{g/mL}$ ; 7.5  $\mu\text{g/mL}$ ; 15  $\mu\text{g/mL}$ ; 60  $\mu\text{g/mL}$ ).

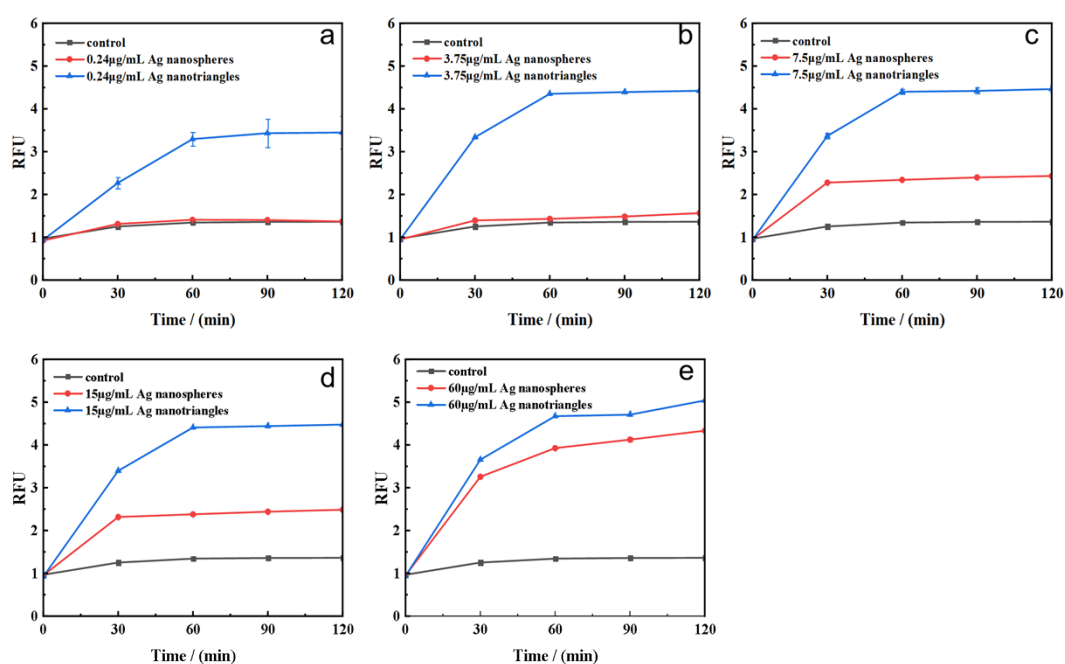

**Fig. S11** ROS generation efficiency of *S. aureus* treated with Ag nanospheres and nanotriangles (a: 0.24  $\mu\text{g/mL}$ ; 3.75  $\mu\text{g/mL}$ ; 7.5  $\mu\text{g/mL}$ ; 15  $\mu\text{g/mL}$ ; 60  $\mu\text{g/mL}$ ).
